# Supplementary material
Source: PubMed Central journal article supplement (PMC7815054)
Supplement: NIHMS1660621-supplement-1660621_Sup_Tab_1-4.pdf [file NIHMS1660621-supplement-1660621_Sup_Tab_1-4.pdf]

**Supplementary Table 1**

| Rank# | Protein Symbol  | Molecular Weight | Quantitative Value | Ran k# | Protein Symbol | Molecular Weight | Quantitative Value |
|-------|-----------------|------------------|--------------------|--------|----------------|------------------|--------------------|
| 1     | Rspo3           | 31 kDa           | 78                 | 41     | Pkm            | 58 kDa           | 4                  |
| 2     | Alb             | 69 kDa           | 48                 | 42     | Ldha           | 35 kDa           | 5                  |
| 3     | Cep162          | 161 kDa          | 37                 | 43     | Ctsz           | 34 kDa           | 3                  |
| 4     | Grn             | 63 kDa           | 33                 | 44     | Ncl            | 77 kDa           | 4                  |
| 5     | Vim             | 54 kDa           | 25                 | 45     | Lgmn           | 49 kDa           | 4                  |
| 6     | Pclo            | 551 kDa          | 17                 | 46     | Col4a2         | 167 kDa          | 4                  |
| 7     | Actb            | 42 kDa           | 18                 | 47     | Tpi1           | 32 kDa           | 4                  |
| 8     | Sparc           | 38 kDa           | 18                 | 48     | Pgam1          | 29 kDa           | 3                  |
| 9     | Actn1           | 103 kDa          | 13                 | 49     | Flna           | 280 kDa          | 4                  |
| 10    | Psap            | 61 kDa           | 13                 | 50     | Calr           | 48 kDa           | 4                  |
| 11    | Plau            | 48 kDa           | 14                 | 51     | Eno1           | 47 kDa           | 4                  |
| 12    | Ctsb            | 37 kDa           | 14                 | 52     | Flnb           | 278 kDa          | 2                  |
| 13    | Ppia            | 18 kDa           | 12                 | 53     | Msn            | 68 kDa           | 4                  |
| 14    | Sacs            | 521 kDa          | 12                 | 54     | Eef2           | 95 kDa           | 2                  |
| 15    | Aldoa           | 45 kDa           | 7                  | 55     | Cd81           | 13 kDa           | 3                  |
| 16    | Hspg2           | 469 kDa          | 7                  | 56     | Kcnu1          | 127 kDa          | 1                  |
| 17    | Hspa8           | 71 kDa           | 12                 | 57     | Krt10          | 57 kDa           | 3                  |
| 18    | Ctsl            | 38 kDa           | 7                  | 58     | Pdia3          | 57 kDa           | 3                  |
| 19    | Fn1             | 263 kDa          | 9                  | 59     | Igfbp4         | 28 kDa           | 3                  |
| 20    | Plec            | 499 kDa          | 6                  | 60     | Pfn1           | 15 kDa           | 3                  |
| 21    | Ywhaz           | 28 kDa           | 9                  | 61     | Pdia6          | 48 kDa           | 3                  |
| 22    | Fbln5           | 52 kDa           | 7                  | 62     | Cst3           | 16 kDa           | 2                  |
| 23    | Ctsd            | 45 kDa           | 6                  | 63     | Ahnak2         | 183 kDa          | 3                  |
| 24    | Ctsa            | 56 kDa           | 7                  | 64     | Fstl1          | 35 kDa           | 3                  |
| 25    | Lgals1          | 15 kDa           | 7                  | 65     | Cpe            | 53 kDa           | 2                  |
| 26    | Pgk1            | 45 kDa           | 6                  | 66     | Ap1p2          | 71 kDa           | 2                  |
| 27    | Hnrnpa1         | 34 kDa           | 5                  | 67     | Wdr1           | 63 kDa           | 2                  |
| 28    | Col18a1         | 182 kDa          | 5                  | 68     | Acaa2          | 42 kDa           | 3                  |
| 29    | Hspa5           | 72 kDa           | 9                  | 69     | Plbd2          | 66 kDa           | 2                  |
| 30    | Cdh5            | 88 kDa           | 6                  | 70     | Ywhag          | 28 kDa           | 4                  |
| 31    | Ahnak           | 604 kDa          | 6                  | 71     | Ywhae          | 29 kDa           | 4                  |
| 32    | Tpm3            | 29 kDa           | 5                  | 72     | Nptx1          | 47 kDa           | 2                  |
| 33    | Tuba1b          | 50 kDa           | 5                  | 73     | Fkbp1a         | 12 kDa           | 2                  |
| 34    | Ecm1            | 63 kDa           | 4                  | 74     | Lgals3bp       | 64 kDa           | 2                  |
| 35    | Tubb3           | 50 kDa           | 2                  | 75     | Ppic           | 23 kDa           | 2                  |
| 36    | Arsa            | 54 kDa           | 4                  | 76     | Tie1           | 70 kDa           | 2                  |
| 37    | D17H6S56<br>E-5 | 66 kDa           | 5                  | 77     | Qsox1          | 83 kDa           | 2                  |
| 38    | Adamts1         | 106 kDa          | 2                  | 78     | Nucb1          | 53 kDa           | 2                  |

|     |           |         |   |     |         |         |   |
|-----|-----------|---------|---|-----|---------|---------|---|
| 39  | Gm8797    | 9 kDa   | 5 | 79  | Tagln2  | 22 kDa  | 2 |
| 40  | Hnrnpa2b1 | 36 kDa  | 5 | 80  | Ywhah   | 28 kDa  | 3 |
| 83  | Lamc1     | 177 kDa | 1 | 120 | Calu    | 37 kDa  | 1 |
| 84  | Gsto1     | 27 kDa  | 1 | 121 | Prdx6   | 22 kDa  | 1 |
| 85  | Myh9      | 226 kDa | 1 | 122 | Dpysl2  | 62 kDa  | 1 |
| 86  | Nid1      | 137 kDa | 1 | 123 | Eef1a1  | 50 kDa  | 1 |
| 87  | Ctsh      | 32 kDa  | 1 | 124 | Hsp90b1 | 92 kDa  | 1 |
| 88  | Hmga2     | 12 kDa  | 1 | 125 | Igfbp3  | 32 kDa  | 1 |
| 89  | Krt78     | 55 kDa  | 3 | 126 | Kpnb1   | 97 kDa  | 1 |
| 90  | Eef1b2    | 20 kDa  | 2 | 127 | Krt77   | 61 kDa  | 1 |
| 91  | Mdh2      | 21 kDa  | 2 | 128 | Lmna    | 74 kDa  | 1 |
| 92  | Vcam1     | 26 kDa  | 2 | 129 | P4hb    | 57 kDa  | 1 |
| 93  | Col4a1    | 34 kDa  | 1 | 130 | Stip1   | 63 kDa  | 1 |
| 94  | Erh       | 8 kDa   | 2 | 131 | Hnrmpu  | 58 kDa  | 1 |
| 95  | Cd93      | 37 kDa  | 2 | 132 | Stc1    | 27 kDa  | 1 |
| 96  | Dbi       | 10 kDa  | 1 | 133 | Rps6    | 29 kDa  | 1 |
| 97  | Pecam1    | 82 kDa  | 2 | 134 | Rtn4    | 39 kDa  | 1 |
| 98  | Pxdn      | 165 kDa | 2 | 135 | Fst     | 38 kDa  | 1 |
| 99  | Casq2     | 50 kDa  | 2 | 136 | Eef1g   | 50 kDa  | 1 |
| 100 | Calm1     | 17 kDa  | 2 | 137 | Csl     | 52 kDa  | 1 |
| 101 | Cavin1    | 44 kDa  | 2 | 138 | Rpl4    | 47 kDa  | 1 |
| 102 | Procr     | 27 kDa  | 2 | 139 | Npm1    | 28 kDa  | 1 |
| 103 | Pebp1     | 21 kDa  | 2 | 140 | Ctla2a  | 16 kDa  | 1 |
| 104 | Tpt1      | 19 kDa  | 2 | 141 | Ppib    | 24 kDa  | 1 |
| 105 | Capg      | 39 kDa  | 2 | 142 | Gapdh   | 39 kDa  | 1 |
| 106 | Ptges3    | 15 kDa  | 1 | 143 | Banf1   | 10 kDa  | 1 |
| 107 | Tnc       | 172 kDa | 2 | 144 | S100a6  | 10 kDa  | 1 |
| 108 | Abcc2     | 174 kDa | 1 | 145 | Cdh13   | 78 kDa  | 1 |
| 109 | Atp5f1b   | 56 kDa  | 1 | 146 | Lyve1   | 35 kDa  | 1 |
| 110 | Kcnma1    | 131 kDa | 1 | 147 | Lama5   | 404 kDa | 1 |
| 111 | Gm14781   | 43 kDa  | 1 | 148 | Krt76   | 63 kDa  | 2 |
| 112 | Stat2     | 106 kDa | 1 | 149 | Tpm4    | 28 kDa  | 1 |
| 113 | Krt79     | 58 kDa  | 2 | 150 | Cd34    | 41 kDa  | 1 |
| 114 | Prcp      | 51 kDa  | 1 | 151 | Rpl12   | 18 kDa  | 1 |
| 115 | Rpl18     | 18 kDa  | 1 | 152 | Polr1a  | 85 kDa  | 1 |
| 116 | Idh3a     | 42 kDa  | 1 | 153 | Atp5f1a | 60 kDa  | 1 |
| 117 | Cd63      | 18 kDa  | 1 | 154 | Nav2    | 61 kDa  | 1 |
| 118 | Pgf       | 18 kDa  | 1 | 155 | Rplp0   | 16 kDa  | 1 |
| 119 | B2m       | 14 kDa  | 1 |     |         |         |   |

**Supplementary Table 1: Proteins identified by secretome assay.**

Conditional medium collected from LPS-activated ECs was used for secretome assay by mass spectrometry, identified proteins were listed by their quantified values as normalized to total spectra.

**Supplementary Table 2**

| <b>Gene</b>    | <b>Forward primer</b>        | <b>Reverse primer</b>          | <b>usage</b>             |
|----------------|------------------------------|--------------------------------|--------------------------|
| <i>Cd86</i>    | CAGACTCCTGTAGACGTGTTCC       | GTCCCATTTGAAATAAGCTTGCG        | qPCR                     |
| <i>Mrc1</i>    | CCACGGATGACCTGTGCTCGA<br>G   | ACACCAGAGCCATCCGTCCGA          | qPCR                     |
| <i>Retnla</i>  | TGCCAATCCAGCTAACTATCCC       | CAGTGGTCCAGTCAACGAGT           | qPCR                     |
| <i>Chil3</i>   | CAGGTCTGGCAATCTTCTGAA        | GTCTTGCTCATGTGTGTAAGTG<br>A    | qPCR                     |
| <i>Arg1</i>    | CTCCAAGCCAAAGTCCTTAGA<br>G   | AGGAGCTGTCATTAGGGACAT<br>C     | qPCR                     |
| <i>Il1b</i>    | GAAATGCCACCTTTTGACAGTG       | TGGATGCTCTCATCAGGACAG          | qPCR                     |
| <i>Tnf</i>     | CCCTCACACTCAGATCATCTTC<br>T  | GCTACGACGTGGGCTACAG            | qPCR                     |
| <i>Lgr4</i>    | CCCGACTTCGCATTCACCAA         | GCCTGAGGAAATTCATCCAAG<br>T     | qPCR                     |
| <i>Lgr5</i>    | CCTACTCGAAGACTTACCCAGT       | GCATTGGGGTGAATGATAGCA          | qPCR                     |
| <i>Lgr6</i>    | GAGGACGGCATCATGCTGTC         | GCTCCGTGAGGTTGTTTCATACT        | qPCR                     |
| <i>Tet1</i>    | CCCTGTGACTGTGATGGAGG         | GTCTACACGCTCACGAACCA           | qPCR                     |
| <i>Tet2</i>    | ATATTGATGCGGAGGCGAGG         | AATGAATCCAGCAGCACCGT           | qPCR                     |
| <i>Tet3</i>    | TGCGATTGTGTCGAACAAATAG<br>T  | TCCATACCGATCCTCCATGAG          | qPCR                     |
| <i>Rspo3</i>   | CAACCAGCGAGACAAGAACT         | TCCAAACCTTTGCTGTCAGAG          | qPCR                     |
| <i>Gapdh</i>   | AGGTCGGTGTGAACGGATTTG        | TGTAGACCATGTAGTTGAGGT<br>C     | qPCR                     |
| <i>Itgam</i>   | ATGGACGCTGATGGCAATACC        | TCCCCATTCACGTCTCCCA            | qPCR                     |
| <i>Pparg</i>   | TCGCTGATGCACTGCCTATG         | GAGAGGTCCACAGAGCTGATT          | qPCR                     |
| <i>Itgax</i>   | CTGGATAGCCTTTCTTCTGCTG       | GCACACTGTGTCCGAACCTCA          | qPCR                     |
| <i>Adgre1</i>  | TTGTACGTGCAACTCAGGACT        | GATCCCAGAGTGTGATGCAA           | qPCR                     |
| <i>Fcgr1</i>   | AGTTTCTCAATGCCAAGTGA         | GCGACCTCCGAATCTGAAGA           | qPCR                     |
| <i>Mertk</i>   | ACCCAGTTGCTAGAGAGCTG         | TGGTGAGTCTGTCTCCGGTAA          | qPCR                     |
| <i>Ctnnb1</i>  | ATGGAGCCGGACAGAAAAGC         | CTTGCCACTCAGGGAAGGA            | qPCR                     |
| <i>Cx3cr1</i>  | GAGTATGACGATTCTGCTGAG<br>G   | CAGACCGAACGTGAAGACGAG          | qPCR                     |
| <i>Cxcl1</i>   | CTGGGATTCACCTCAAGAACAT<br>C  | CAGGGTCAAGGCAAGCCTC            | qPCR                     |
| <i>Nos2</i>    | GTTCTCAGCCCAACAATACAAG<br>A  | GTGGACGGTTCGATGTCAC            | qPCR                     |
| <i>Siglecf</i> | GCTGGTCTTATGGCCTTGCTT        | TGCTAACAGAAACAATGGGCA          | qPCR                     |
| <i>Cd80</i>    | ACCCCAACATAACTGAGTCT         | TTCCAACCAAGAGAAGCGAGG          | qPCR                     |
| <i>Cd69</i>    | AGGCTTGACGAGAAGTTGGA         | AGTTCACCAGAATATCGCTTCA<br>G    | qPCR                     |
| <i>Il6</i>     | CTGCAAGAGACTTCCATCCAG        | AGTGGTATAGACAGGTCTGTT<br>GG    | qPCR                     |
| <i>Il10</i>    | GCTCTTACTGACTGGCATGAG        | CGCAGCTCTAGGAGCATGTG           | qPCR                     |
| <i>Clec7a</i>  | GACTTCAGCACTCAAGACATC<br>C   | TTGTGTGCGCCAAAATGCTAGG         | qPCR                     |
| <i>Clec10a</i> | TGAGAAAGGCTTTAAGAAGTGG<br>GG | GACCACCTGTAGTGATGTGGG          | qPCR                     |
| <i>Tgfb1</i>   | CTCCCGTGGCTTCTAGTGC          | GCCTTAGTTTGGACAGGATCT<br>G     | qPCR                     |
| <i>Mrc1</i>    | TTTCACTTGAAGGTAAACCATC<br>TG | CCAGAGTTCAACAAGAATTAAG         | hMeDIP/<br>ChIP-qP<br>CR |
| <i>Arg1</i>    | TGAACAGGCTGTATTAGCCAA<br>CA  | AGCACCTCAACCCAAAGTG            | hMeDIP/<br>ChIP-qP<br>CR |
| <i>Chil3</i>   | CATTTGCCCTGCCTTTGG           | TCTTTTCATGGATATTGATTTCC<br>TAA | hMeDIP/<br>ChIP-qP<br>CR |
| <i>Retnla</i>  | TGCAATTCTTTGATGCTGTGTC<br>T  | TTGTGTCCCTTGGCTACATGAA         | hMeDIP/<br>ChIP-qP<br>CR |

**Supplementary Table 2: Primer sequences used in this study.**

The sequences for primers used for qPCR, ChIP-qPCR and hMeDIP-qPCR in this study.

**Supplementary Table 3**

| Antibodies                                      | Source              | Cat#         | Dilution |
|-------------------------------------------------|---------------------|--------------|----------|
| FITC anti-mouse CD11b Antibody                  | BioLegend           | 101205       | 1:200    |
| APC anti-mouse CD11b Antibody                   | BioLegend           | 101211       | 1:200    |
| PE anti-mouse CD11b Antibody                    | BioLegend           | 101207       | 1:200    |
| APC anti-mouse F4/80 Antibody                   | BioLegend           | 123115       | 1:200    |
| FITC anti-mouse F4/80 Antibody                  | BioLegend           | 123107       | 1:200    |
| PE anti-mouse F4/80 Antibody                    | BioLegend           | 123109       | 1:200    |
| APC anti-mouse CD64 Antibody                    | BioLegend           | 139305       | 1:100    |
| FITC anti-mouse CD64 Antibody                   | BioLegend           | 139315       | 1:100    |
| PE anti-mouse CD64 Antibody                     | BioLegend           | 139303       | 1:100    |
| Alexa Fluor® 647 anti-mouse CD64 Antibody       | BioLegend           | 139321       | 1:100    |
| APC anti-mouse CD206 Antibody                   | BioLegend           | 141707       | 1:200    |
| Alexa Fluor 488 anti-mouse CD206 Antibody       | BioLegend           | 141709       | 1:200    |
| PE anti-mouse CD206 Antibody                    | BioLegend           | 141705       | 1:200    |
| Alexa Fluor 700 anti-mouse CD206 Antibody       | BioLegend           | 141733       | 1:200    |
| PE anti-mouse CD86 Antibody                     | BioLegend           | 159203       | 1:100    |
| Alexa Fluor 700 anti-mouse CD86 Antibody        | BioLegend           | 105023       | 1:100    |
| Pacific Blue anti-mouse CD86 Antibody           | BioLegend           | 105021       | 1:100    |
| APC anti-mouse CD301 Antibody                   | BioLegend           | 145707       | 1:100    |
| Pacific Blue anti-mouse CD301 Antibody          | BioLegend           | 145709       | 1:100    |
| anti-Arginase1 Antibody                         | Novus               | MAB58681     | 1:100    |
| APC anti-mouse CD80 Antibody                    | BioLegend           | 104713       | 1:100    |
| Purified anti-mouse CD80 Antibody               | BioLegend           | 104702       | 1:100    |
| PerCP/Cyanine5.5 anti-mouse CD80 Antibody       | BioLegend           | 104721       | 1:100    |
| anti-mouse TNF $\alpha$ Antibody                | Novus               | MAB4101      | 1:100    |
| Purified anti-NOS2 Antibody                     | BioLegend           | 690902       | 1:100    |
| PE anti-mouse IL-10 Antibody                    | BioLegend           | 505007       | 1:50     |
| PE anti-mouse TET2 Antibody                     | Cell Signaling Tech | 79468        | 1:50     |
| PE anti- $\beta$ -Catenin Antibody              | BioLegend           | 844605       | 1:100    |
| Alexa Fluor 488 anti- $\beta$ -Catenin Antibody | Novus               | NBP1-54467F  | 1:50     |
| anti-LGR4 Antibody                              | R&D                 | FAB7750P-025 | 1:100    |
| anti-LGR5 Antibody                              | R&D                 | MAB8240      | 1:100    |
| anti-LGR6 Antibody                              | Novus               | 918719       | 1:100    |
| Purified anti-Rspondin3 Antibody                | ThermoFisher        | PA5-38052    | 1:200    |
| Pacific Blue anti-mouse CD45 Antibody           | BioLegend           | 103125       | 1:100    |
| PE/Cy5 anti-mouse CD45 Antibody                 | BioLegend           | 103109       | 1:100    |
| Brilliant Violet 605 anti-mouse Ly6G Antibody   | BioLegend           | 127639       | 1:100    |
| PerCP anti-mouse Ly6G Antibody                  | BioLegend           | 127653       | 1:100    |
| PE anti-mouse Siglec-F Antibody                 | BioLegend           | 155505       | 1:200    |
| APC/Cy7 anti-mouse Siglec-F Antibody            | BDBiosciences       | 565527       | 1:200    |
| APC anti-mouse MERTK Antibody                   | BioLegend           | 151507       | 1:100    |
| FITC anti-mouse MERTK Antibody                  | BioLegend           | 151503       | 1:100    |
| PE anti-mouse MERTK Antibody                    | BioLegend           | 151505       | 1:100    |

**Supplementary Table 3: Antibodies used for flow cytometry in this study.**

The sources of antibodies used for flow cytometry as well as their dilution ratios were listed in this table.

**Supplementary Table 4**

| Target antigen | Metal Tag | Clone       | Company        | Catalog number | Titer to use |              |
|----------------|-----------|-------------|----------------|----------------|--------------|--------------|
| CD11b          | 148Nd     | M1/70       | Fluidigm       | 3148003        | 1:100        |              |
| F4/80          | 159Tb     | BM8         | Fluidigm       | 3159009        | 1:100        |              |
| CD64           | 151Eu     | X54-5/7.1   | Fluidigm       | 3151012        | 1:100        |              |
| MerTK          | 147Sm     | 2B10C42     | Biolegend      | 151502         | 0.5 µg/ml    | self-labeled |
| Ly6-G          | 141Pr     | 1A8         | Fluidigm       | 3141008        | 1:100        |              |
| Ly6-C          | 162Dy     | HK1.4       | Fluidigm       | 3162014        | 1:100        |              |
| CD24           | 150Nd     | M1/89       | Fluidigm       | 3150009        | 1:100        |              |
| CD206          | 169Tm     | C068C2      | Fluidigm       | 3169021        | 1:100        |              |
| CD86           | 172Yb     | GL1         | Fluidigm       | 3171008        | 1:100        |              |
| CD301          | 155Gd     | AAH14811    | R&D            | AF4297         | 0.5 µg/ml    |              |
| CD19           | 149Sm     | 6D5         | Fluidigm       | 3149002        | 1:100        |              |
| CD3            | 152Sm     | 145-2C11    | Fluidigm       | 3152004        | 1:100        |              |
| CD49           | 170Er     | HMa2        | Fluidigm       | 3170008        | 1:100        |              |
| SiglecF        | 176Yb     | E50-2440    | BD Biosciences | 552125         | 0.5 µg/ml    | self-labeled |
| CD11c          | 142Nd     | N418        | Fluidigm       | 3142003        | 1:100        |              |
| Arginase I     | 156Gd     | P05089      | R&D            | AF5868         | 0.5 µg/ml    | self-labeled |
| LGR4           | 153Eu     | BBX-3A8     | Abcam          | ab166659       | 0.5 µg/ml    | self-labeled |
| β-Catenin      | 165Ho     | D13A1       | Fluidigm       | 3165027        | 1:100        |              |
| TER119         | 154Sm     | TER-119     | Fluidigm       | 3154005        | 1:100        |              |
| IL-10          | 158Gd     | JES5-16E3   | Fluidigm       | 3158002        | 1:100        |              |
| iNOS           | 161Dy     | CXNFT       | Fluidigm       | 3161011        | 1:100        |              |
| TNF            | 162Dy     | MP6-XT22    | Fluidigm       | 3162002        | 1:100        |              |
| CX3CR1         | 164Dy     | SA011F11    | Fluidigm       | 3164023        | 1:100        |              |
| GFP            | 169Tm     | 5F12.4      | Fluidigm       | 3169009        | 1:100        |              |
| CD80           | 171Yb     | 16-10A1     | Fluidigm       | 3171008        | 1:100        |              |
| I-A/I-E        | 209Bi     | M5/114.15.2 | Fluidigm       | 3209006        | 1:100        |              |
| CD45           | 89Y       | 30-F11      | Fluidigm       | 3089005        | 1:100        |              |
| CD115          | 144Nd     | AFS98       | Fluidigm       | 3144012        | 1:100        |              |
| CD69           | 145Nd     | H1.2F3      | Fluidigm       | 3145005        | 1:100        |              |
| CCR2           | 146Nd     | 475301R     | R&D            | MAB55381R      | 0.5 µg/ml    | self-labeled |
| BST-2          | 163Dy     | 44E9R       | R&D            | MAB8660        | 0.5 µg/ml    | self-labeled |
| REMLα          | 168Er     | Q9EP95      | R&D            | MAB1523        | 0.5 µg/ml    | self-labeled |
| CD103          | 173Yb     | Q60677      | R&D            | AF1990         | 0.5 µg/ml    | self-labeled |

**Supplementary Table 4: Antibodies used for CyTOF (Mass Cytometry).**

The antibodies used for CyTOF assay in this study as well as their dilution ratios in this study.
